# Supplementary material for: Adverse effects of Hif1a mutation and maternal diabetes on the offspring heart
Source: PubMed Central journal article supplement (PMC5948854; doi:10.1186/s12933-018-0713-0), 2018-05-12
Supplement: 12933_2018_713_MOESM1_ESM.pdf [file 12933_2018_713_MOESM1_ESM.pdf]

**Table S1.** Primer sequences for RT-qPCR

| <b>Gene name</b>                 | <b>sequence 5'→3'</b>                                         |
|----------------------------------|---------------------------------------------------------------|
| <i>Hprt1</i> F<br><i>Hprt1</i> R | GCTTGCTGGTGAAAAGGACCTCTCGAAG<br>CCTGAAGTACTCATTATAGTCAAGGGCAT |
| <i>Axl</i> F<br><i>Axl</i> R     | CATCCTCAAGGTCGCTGTGA<br>CATGACGTTGGGGTGGTCAA                  |
| <i>Ccl9</i> F<br><i>Ccl9</i> R   | AGCCTTTTCATACTGCCCTCT<br>CAATTTCAAGCCCTTGCTGTG                |
| <i>Cd248</i> F<br><i>Cd248</i> R | GCAGCCTTACAGGGGTACAG<br>TGTGGTCTCAGCCATGTGTC                  |
| <i>CD36</i> F<br><i>CD36</i> R   | GCTCGTTTCAACTCTCACACAC<br>TACGTGGCCCGGTTCTACTA                |
| <i>Cfp</i> F<br><i>Cfp</i> R     | CCATGTAGTCCCAACGCCAC<br>TCTCACCCCTGACCTTCAACC                 |
| <i>Fbn1</i> F<br><i>Fbn1</i> R   | GCAGAAACACGATTGGCTCC<br>GTTCCCGTTTCCAGTTGCAC                  |
| <i>Herc3</i> F<br><i>Herc3</i> R | TTGAAGGAACTGTCACCAACTG<br>TGTCTTCACCGGGGTAATCT                |
| <i>Icam</i> F<br><i>Icam</i> R   | GAGACGCAGAGGACCTTAACA<br>ACAGTTACTTGGCTCCCTTCC                |
| <i>Kdm3a</i> F<br><i>Kdm3a</i> R | GGGAATGTCAACAAGGAGAATAA<br>TTGTTCCAGAGGGGGCAAG                |
| <i>LDHa</i> F<br><i>LDHa</i> R   | GCACTGACGCAGACAAGG<br>TGATCACCTCGTAGGCACTG                    |
| <i>Lrp1</i> F<br><i>Lrp1</i> R   | ACTGGACTAACTGGCACACG<br>CGATACCCCTCGGCATCTTC                  |
| <i>Msr1</i> F<br><i>Msr1</i> R   | GGGAAGTGGATAAATCAGTGCT<br>CCTCTTGTTTCATGAGGGCAGA              |
| <i>Mylk3</i> F<br><i>Mylk3</i> R | ACTTTGGTAGGGTCCACATTCC<br>CTAGAGGCGTCAGCTTGCAC                |
| <i>Pi16</i> F<br><i>Pi16</i> R   | TGGCACGAGGAGCATGAGTA<br>GGGAGCCACAGCCAATTCTC                  |
| <i>Tgfb1</i> F<br><i>Tgfb1</i> R | GCTGAACCAAGGAGACGGAA<br>ATGTCATGGATGGTGCCAG                   |
| <i>Tgfb2</i> F<br><i>Tgfb2</i> R | CGATTACATCATCTTTTCGGAAG<br>TGGACACGGTAGCAGTAGAAGA             |
| <i>Timp1</i> F<br><i>Timp1</i> R | GGCATCTGGCATCCTCTTGT<br>TGGTCTCGTTGATTTCTGGGG                 |
| <i>Vegfa</i> F<br><i>Vegfa</i> R | ACTGGACCCTGGCTTTACTG<br>TGGGACTTCTGCTCTCCTTC                  |
