# Supplementary material for: Adverse effects of Hif1a mutation and maternal diabetes on the offspring heart
Source: PubMed Central journal article supplement (PMC5948854; doi:10.1186/s12933-018-0713-0), 2018-05-12
Supplement: 12933_2018_713_MOESM7_ESM.pdf [file 12933_2018_713_MOESM7_ESM.pdf]

**Table S7:** The list of the references for genes linked to HIF-1 signalling by manual literature search

| <b>Symbol</b> | <b>Name</b>                                               | <b>PubMed ID</b> |
|---------------|-----------------------------------------------------------|------------------|
| Adgrd1        | adhesion G protein-coupled receptor D1                    | PMID: 27775701   |
| Adra1a        | adrenergic receptor, alpha 1a                             | PMC2951593       |
| Aldh1a2       | aldehyde dehydrogenase family 1, subfamily A2             | PMID: 26220168   |
| Amigo2        | adhesion molecule with Ig like domain 2                   | PMID: 20848564   |
| Axl           | AXL receptor tyrosine kinase                              | PMID: 25187556   |
| Blk           | B lymphoid kinase                                         | PMID: 26626568   |
| C1qa          | complement component 1, q subcomponent, alpha polypeptide | PMID: 28858246   |
| C1qb          | complement component 1, q subcomponent, beta polypeptide  | PMID: 28858246   |
| Capg          | capping protein (actin filament), gelsolin-like           | PMID: 19188659   |
| Ccl2          | chemokine (C-C motif) ligand 2                            | PMID: 14734750   |
| Ccl7          | chemokine (C-C motif) ligand 7                            | PMID: 20729179   |
| Ccl9          | chemokine (C-C motif) ligand 9                            | PMID: 15625408   |
| Cd248         | CD248 antigen, endosialin                                 | PMID: 18813310   |
| Cd53          | CD53 antigen                                              | PMID: 15625408   |
| Cd55          | CD55 molecule, decay accelerating factor for complement   | PMID: 15923405   |
| Col3a1        | collagen, type III, alpha 1                               | PMID: 19790048   |
| Coro1a        | coronin, actin binding protein 1A                         | PMID: 16565084   |
| Cpn2          | carboxypeptidase N, polypeptide 2                         | PMID: 24867948   |
| Ctsc          | cathepsin C                                               | PMID: 19454749   |
| Ctss          | cathepsin S                                               | PMID: 23816886   |
| Cxcl1         | chemokine (C-X-C motif) ligand 1                          | PMID: 19454749   |
| Dclk1         | doublecortin-like kinase 1                                | PMID: 27320910   |
| Dpt           | dermatopontin                                             | PMID: 23262218   |
| Ecm1          | extracellular matrix protein 1                            | PMID: 22495609   |
| Emp3          | epithelial membrane protein 3                             | PMID: 15100389   |
| F13a1         | coagulation factor XIII, A1 subunit                       | PMID: 27211559   |
| Fbln1         | fibulin 1                                                 | PMID: 22495609   |
| Fbn1          | fibrillin 1                                               | PMID: 29215599   |
| Fcgr2b        | Fc receptor, IgG, low affinity IIb                        | PMID: 16849508   |
| Fgl2          | fibrinogen-like protein 2                                 | PMID: 20416888   |
| Folr2         | folate receptor 2 (fetal)                                 | PMID: 26209622   |
| Frat2         | frequently rearranged in advanced T cell lymphomas 2      | PMID: 19725949   |
| Fstl1         | follistatin-like 1                                        | PMID: 28361925   |
| Fxyd5         | FXDY domain-containing ion transport regulator 5          | PMC2743718       |
| Fyb           | FYN binding protein                                       | PMID: 24114211   |
| G0s2          | G0/G1 switch gene 2                                       | PMID: 24344269   |
| Gas7          | growth arrest specific 7                                  | PMID: 16849508   |
| Gsta3         | glutathione S-transferase, alpha 3                        | PMID: 21447374   |
| Ifitm1        | interferon induced transmembrane protein 1                | PMID: 20003295   |
| Igfbp4        | insulin-like growth factor binding protein 4              | PMID: 18366759   |

**Table S7:** Continued

| <b>Symbol</b> | <b>Name</b>                                        | <b>PubMed ID</b>                  |
|---------------|----------------------------------------------------|-----------------------------------|
| Il33          | interleukin 33                                     | PMID: 23967327                    |
| Itgb2         | integrin beta 2                                    | PMID: 19740309                    |
| Kap           | kidney androgen regulated protein                  | PMID: 15263007                    |
| Kdm3a         | lysine (K)-specific demethylase 3A                 | PMID: 22645302                    |
| Lbp           | lipopolysaccharide binding protein                 | PMID: 18984585                    |
| Loxl2         | lysyl oxidase-like 2                               | PMID: 22645302                    |
| Lrp1          | low density lipoprotein receptor-related protein 1 | PMID: 21454812                    |
| Lyve1         | lymphatic vessel endothelial hyaluronan receptor 1 | PMID: 26828208                    |
| Mmp9          | matrix metalloproteinase 9                         | PMID: 18097553                    |
| Mpeg1         | macrophage expressed gene 1                        | PMID: 18469115                    |
| Msr1          | macrophage scavenger receptor 1                    | PMID: 19641936                    |
| Myh11         | myosin, heavy polypeptide 11, smooth muscle        | PMID: 27456656                    |
| Myocd         | myocardin                                          | PMID: 27144530,<br>PMID: 19098903 |
| Ncf1          | neutrophil cytosolic factor 1                      | PMID: 18314479                    |
| Nrn1          | neuritin 1                                         | PMID: 19491311                    |
| Pcf11         | PCF11 cleavage and polyadenylation factor subunit  | PMID: 19386601,<br>PMID: 17532074 |
| Pirb          | paired Ig-like receptor B                          | PMID: 22580685                    |
| Ptgis         | prostaglandin I2 (prostacyclin) synthase           | PMID: 15374877                    |
| Ptgs1         | prostaglandin-endoperoxide synthase 1              | PMID: 15374877                    |
| Ptprj         | protein tyrosine phosphatase, receptor type, J     | PMID: 23007793                    |
| Rab15         | RAB15, member RAS oncogene family                  | PMID: 17828398                    |
| Rrad          | Ras-related associated with diabetes               | PMID: 25114038                    |
| Sla           | src-like adaptor                                   | PMID: 21447827                    |
| SrpX          | sushi-repeat-containing protein                    | PMID: 16565084                    |
| Stab1         | stabilin 1                                         | PMID: 16849508                    |
| Tgfbr2        | transforming growth factor, beta receptor II       | PMID: 26146544                    |
| Timp1         | tissue inhibitor of metalloproteinase 1            | PMID: 16711028                    |
| Vav1          | vav 1 oncogene                                     | PMID: 16849508                    |
| Vwf           | Von Willebrand factor                              | PMID: 23580145                    |
