# Supplementary material for: Adverse effects of Hif1a mutation and maternal diabetes on the offspring heart
Source: PubMed Central journal article supplement (PMC5948854; doi:10.1186/s12933-018-0713-0), 2018-05-12
Supplement: 12933_2018_713_MOESM9_ESM.pdf [file 12933_2018_713_MOESM9_ESM.pdf]

**Table S9.** Bioinformatics mammalian phenotype ontology enrichment analysis using MouseMine Analysis Tools.

| <b>Mammalian Phenotype Ontology Enrichment Category</b> | Holm-Bonferroni | Number of genes |
|---------------------------------------------------------|-----------------|-----------------|
| abnormal innate immunity [MP:0002419]                   | 3.93E-10        | 25              |
| abnormal blood vessel physiology [MP:0000249]           | 5.85E-06        | 17              |
| abnormal vascular smooth muscle physiology [MP:0005595] | 0.002573        | 9               |
| abnormal immune system physiology [MP:0001790]          | 2.10E-08        | 51              |
| immune system phenotype [MP:0005387]                    | 2.74E-07        | 60              |
| homeostasis/metabolism phenotype [MP:0005376]           | 0.000693        | 63              |
