# Supplementary material for: Adverse effects of Hif1a mutation and maternal diabetes on the offspring heart
Source: PubMed Central journal article supplement (PMC5948854; doi:10.1186/s12933-018-0713-0), 2018-05-12
Supplement: 12933_2018_713_MOESM12_ESM.pdf [file 12933_2018_713_MOESM12_ESM.pdf]

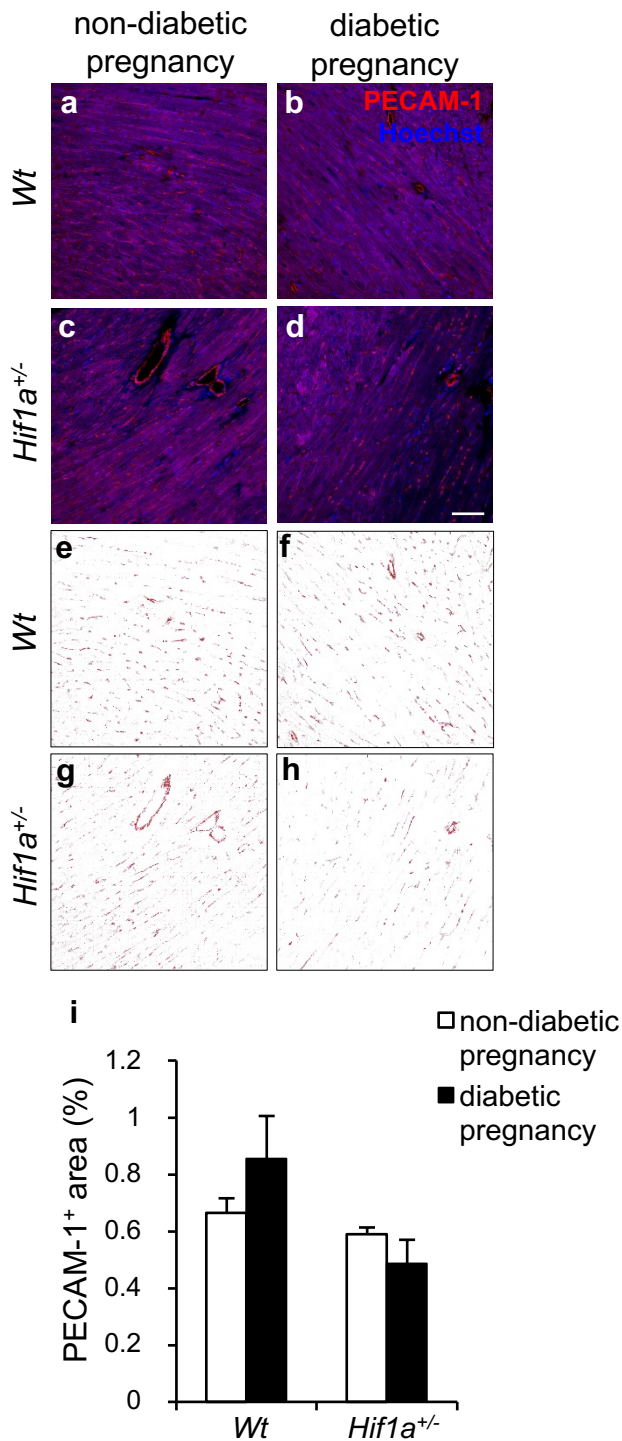

**Figure S3. PECAM-1 expression in the LV.** Representative images of staining of PECAM-1 (red) with Hoechst stained cell nuclei (blue) in the LV of 12 week-old offspring (a-d). Scale bar = 50  $\mu$ m. e-h: Delineated PECAM<sup>+</sup> area in the myocardium using Adobe Photoshop. Quantification of PECAM-1 staining determined as a percentage of positive area in the field of view by ImageJ (i). The values are mean  $\pm$  SEM (n = 4). Statistical significance assessed by two-way ANOVA: genotype effect P = 0.0302, followed by post hoc Tukey's multiple-comparison test with no significant result.
