# Supplementary material for: Adverse effects of Hif1a mutation and maternal diabetes on the offspring heart
Source: Springer Nature journal article supplement (doi:10.1186/s12933-018-0713-0), 2018-05-12
Supplement: MOESM2 [file 15759178]

**Table S2.** Basal left ventricular echocardiographic parameters, heart rate, and body weight of the offspring.

**1-week-old male offspring**

| group/(n)                                                 | AWTd | LVDd | PWTd | AWTs | LVDs | PWTs | FS % | HR  | BW    |
|-----------------------------------------------------------|------|------|------|------|------|------|------|-----|-------|
| <i>Wt</i> non-diabetic pregnancy/(n=20)                   | 0.37 | 1.92 | 0.39 | 0.62 | 0.86 | 0.67 | 55.5 | 444 | 3.7   |
| SEM                                                       | 0.01 | 0.03 | 0.01 | 0.02 | 0.03 | 0.01 | 1.4  | 16  | 0.09  |
| <i>Wt</i> diabetic pregnancy/(n=14)                       | 0.4  | 1.69 | 0.4  | 0.56 | 0.74 | 0.65 | 56.3 | 431 | 2.8   |
| SEM                                                       | 0.01 | 0.06 | 0.01 | 0.02 | 0.04 | 0.03 | 1.24 | 16  | 0.19  |
| <i>Hif1a</i> <sup>+/-</sup> non-diabetic pregnancy/(n=17) | 0.4  | 1.99 | 0.41 | 0.62 | 0.93 | 0.68 | 53.5 | 421 | 3.7   |
| SEM                                                       | 0.01 | 0.03 | 0.01 | 0.02 | 0.04 | 0.02 | 1.68 | 14  | 0.1   |
| <i>Hif1a</i> <sup>+/-</sup> diabetic pregnancy/(n=9)      | 0.37 | 1.74 | 0.38 | 0.55 | 0.83 | 0.59 | 52.9 | 431 | 3.0   |
| SEM                                                       | 0.01 | 0.1  | 0.01 | 0.02 | 0.07 | 0.03 | 2.05 | 22  | 0.253 |

**12-week-old male offspring**

| group/(n)                                                 | AWTd | LVDd | PWTd | AWTs | LVDs | PWTs | FS %                | HR                | BW                 |
|-----------------------------------------------------------|------|------|------|------|------|------|---------------------|-------------------|--------------------|
| <i>Wt</i> non-diabetic pregnancy/(n=20)                   | 0.76 | 3.92 | 0.7  | 1.17 | 2.31 | 1.22 | 41.2 <sup>†‡§</sup> | 477 <sup>†§</sup> | 25.9 <sup>†§</sup> |
| SEM                                                       | 0.02 | 0.06 | 0.02 | 0.02 | 0.05 | 0.02 | 0.6                 | 6                 | 1.5                |
| <i>Wt</i> diabetic pregnancy/(n=15)                       | 0.69 | 3.73 | 0.66 | 1.02 | 2.35 | 1.06 | 37.0 <sup>§</sup>   | 440 <sup>*</sup>  | 23.6 <sup>*‡</sup> |
| SEM                                                       | 0.01 | 0.04 | 0.01 | 0.02 | 0.04 | 0.02 | 0.4                 | 10                | 0.6                |
| <i>Hif1a</i> <sup>+/-</sup> non-diabetic pregnancy/(n=15) | 0.75 | 3.93 | 0.70 | 1.10 | 2.46 | 1.13 | 37.5 <sup>§</sup>   | 469 <sup>§</sup>  | 27.6 <sup>†§</sup> |
| SEM                                                       | 0.02 | 0.09 | 0.02 | 0.03 | 0.09 | 0.03 | 1.1                 | 10                | 0.8                |
| <i>Hif1a</i> <sup>+/-</sup> diabetic pregnancy/(n=10)     | 0.62 | 3.85 | 0.61 | 0.91 | 2.64 | 0.93 | 31.4 <sup>*†‡</sup> | 425 <sup>*‡</sup> | 24.0 <sup>*‡</sup> |
| SEM                                                       | 0.01 | 0.04 | 0.01 | 0.02 | 0.03 | 0.03 | 0.6                 | 10                | 0.7                |

**1-week-old female offspring**

| group/(n)                                                 | AWTd | LVDd | PWTd | AWTs | LVDs | PWTs | FS % | HR  | BW   |
|-----------------------------------------------------------|------|------|------|------|------|------|------|-----|------|
| <i>Wt</i> non-diabetic pregnancy/(n=19)                   | 0.36 | 1.87 | 0.38 | 0.60 | 0.83 | 0.64 | 55.6 | 439 | 3.6  |
| SEM                                                       | 0.01 | 0.03 | 0.01 | 0.02 | 0.04 | 0.02 | 1.47 | 14  | 0.10 |
| <i>Wt</i> diabetic pregnancy/(n=18)                       | 0.39 | 1.75 | 0.39 | 0.61 | 0.79 | 0.64 | 54.9 | 427 | 3.1  |
| SEM                                                       | 0.01 | 0.05 | 0.01 | 0.01 | 0.03 | 0.02 | 1.14 | 12  | 0.15 |
| <i>Hif1a</i> <sup>+/-</sup> non-diabetic pregnancy/(n=22) | 0.38 | 1.90 | 0.40 | 0.62 | 0.83 | 0.67 | 56.1 | 429 | 3.4  |
| SEM                                                       | 0.01 | 0.03 | 0.01 | 0.02 | 0.02 | 0.02 | 1.07 | 13  | 0.11 |
| <i>Hif1a</i> <sup>+/-</sup> diabetic pregnancy/(n=7)      | 0.39 | 1.71 | 0.40 | 0.57 | 0.77 | 0.61 | 54.9 | 416 | 3.0  |
| SEM                                                       | 0.01 | 0.06 | 0.01 | 0.01 | 0.04 | 0.02 | 1.44 | 31  | 0.21 |

**12-week-old female offspring**

| group/(n)                                                 | AWTd | LVDd | PWTd | AWTs | LVDs | PWTs | FS %                | HR  | BW                 |
|-----------------------------------------------------------|------|------|------|------|------|------|---------------------|-----|--------------------|
| <i>Wt</i> non-diabetic pregnancy/(n=22)                   | 0.67 | 3.72 | 0.65 | 1.08 | 2.29 | 1.09 | 38.1 <sup>†‡§</sup> | 419 | 22.8 <sup>†§</sup> |
| SEM                                                       | 0.01 | 0.03 | 0.01 | 0.01 | 0.02 | 0.02 | 0.4                 | 11  | 0.4                |
| <i>Wt</i> diabetic pregnancy/(n=19)                       | 0.64 | 3.6  | 0.64 | 0.93 | 2.35 | 1.01 | 34.4 <sup>†‡§</sup> | 434 | 20.8 <sup>*‡</sup> |
| SEM                                                       | 0.01 | 0.05 | 0.01 | 0.02 | 0.04 | 0.02 | 0.4                 | 10  | 0.5                |
| <i>Hif1a</i> <sup>+/-</sup> non-diabetic pregnancy/(n=23) | 0.71 | 3.68 | 0.7  | 1.02 | 2.35 | 1.07 | 36.1 <sup>†‡§</sup> | 406 | 22.5 <sup>†</sup>  |
| SEM                                                       | 0.01 | 0.03 | 0.02 | 0.02 | 0.03 | 0.02 | 0.5                 | 9   | 0.3                |
| <i>Hif1a</i> <sup>+/-</sup> diabetic pregnancy/(n=7)      | 0.65 | 3.58 | 0.57 | 0.86 | 2.44 | 0.86 | 31.8 <sup>*†‡</sup> | 449 | 19.7 <sup>*‡</sup> |
| SEM                                                       | 0.01 | 0.09 | 0.01 | 0.02 | 0.09 | 0.02 | 1.2                 | 14  | 0.5                |

AWTd, diastolic anterior wall thickness; LVDd, left ventricle diastolic cavity diameter; PWTd, diastolic posterior wall thickness; AWTs systolic anterior wall thickness; LVDs, left ventricle systolic cavity diameter; PWTs, systolic posterior wall thickness; FS%, fractional shortening; HR, heart rate; BW, body weight. Significant differences by post hoc Tukey's multiple-comparison test; \*, P < 0.05 in comparison to *Wt* non-diabetic pregnancy; †, P < 0.05 in comparison to *Wt* diabetic pregnancy; ‡, P < 0.05 in comparison to *Hif1a*<sup>+/-</sup> non-diabetic pregnancy; §, P < 0.05 in comparison to *Hif1a*<sup>+/-</sup> diabetic pregnancy.
