# Supplementary material for: Adverse effects of Hif1a mutation and maternal diabetes on the offspring heart
Source: Springer Nature journal article supplement (doi:10.1186/s12933-018-0713-0), 2018-05-12
Supplement: MOESM5 [file 15759178]

**Table S5:** List of differentially expressed genes with fold change  $\geq 30\%$ 

| <b>Group/Genes (N)</b>             | <b>List of genes</b>                                                                                                                                                                                                                                                                                                                                                                                                                                                                                                                                                                                                                                                                                                                                                                                |
|------------------------------------|-----------------------------------------------------------------------------------------------------------------------------------------------------------------------------------------------------------------------------------------------------------------------------------------------------------------------------------------------------------------------------------------------------------------------------------------------------------------------------------------------------------------------------------------------------------------------------------------------------------------------------------------------------------------------------------------------------------------------------------------------------------------------------------------------------|
| Upregulated genes (111)            | <i>Itgb2, Cfp, Timp1, Vwf, Axl, Pla1a, Hck, Cadm3, Fbln1, Fxyd5, Aldh1a2, Adamtsl4, Ncf1, Lbp, Cmah, Igfbp4, Ptgis, Ccl6, Ccl9, Plek, Myo1g, Rab15, Stmn4, Dok2, Fyb, Dab2, Sla, Ccdc80, Fstl1, Hcls1, Clec4n, Pi16, Emilin2, Ms4a6d, Il33, Msr1, Ptpnj, Ifitm1, Clec3b, Gsta3, Col3a1, Cd55, Dpt, Fcgr2b, Mrc1, Fcna, Duoxa1, Dclk1, Ecm1, Laptm5, Kcnab2, Pf4, Cxcl1, Arpc1b, Mfap5, Ctsc, Tyrobp, Coro1a, Lyve1, Cotl1, Rrad, Tgfbr2, Folr2, Gas7, Duox1, Casp4, Tlr13, Vav1, Loxl2, Cd300ld, Pknox2, March1, C1qa, C1qc, C1qb, Ctss, F13a1, Fgl2, Emp3, Lrp1, C3ar1, Ildr2, Cd53, Nbl1, Stab1, Adgrd1, Mpeg1, Ptgs1, Nxpe5, Frat2, A4galt, Amigo2, P2ry6, Dact2, C5ar1, Cd14, Cd248, Capg, Pirb, Lyz2, Wfdc17, Adamtsl3, Ncf4, SrpX, Mknk2, Tsc22d3, Aldh1a1, Cyt11, Hif1a, Plekhh1, Zfp442</i> |
| Downregulated genes (25)           | <i>Scin, G0s2, Blk, Myh11, Myocd, Iqgap2, Xpo4, Zbtb11, Cpn2, Zfp397, Tspan18, Malt1, Nrn1, Ptchd3, Pcf11, Slc35e2, Olfr78, Gpr22, Adra1a, Cdh20, Kdm3a, Pm20d2, Luzp2, Txnip, Trp53i11</i>                                                                                                                                                                                                                                                                                                                                                                                                                                                                                                                                                                                                         |
| Differentially regulated genes (8) | <i>Mmp9, Itgam, Kap, Ccl7, Ccl2, Ackr2, Fmr1nb, Fbn1</i>                                                                                                                                                                                                                                                                                                                                                                                                                                                                                                                                                                                                                                                                                                                                            |
