# Supplementary material for: Adverse effects of Hif1a mutation and maternal diabetes on the offspring heart
Source: Springer Nature journal article supplement (doi:10.1186/s12933-018-0713-0), 2018-05-12
Supplement: MOESM8 [file 15759178]

**Table S8.** Bioinformatics enrichment analysis using gProfiler: g:GOST Gene Group Functional Profiling tool.

**Enriched  
biological process  
category/Hits (N)      List of genes**

|                                               |                                          |                                                                                                                                                                                                                                                                                                                                                                                                                                                                                                                                                                                                                                 |
|-----------------------------------------------|------------------------------------------|---------------------------------------------------------------------------------------------------------------------------------------------------------------------------------------------------------------------------------------------------------------------------------------------------------------------------------------------------------------------------------------------------------------------------------------------------------------------------------------------------------------------------------------------------------------------------------------------------------------------------------|
| <b>Wt diabetic pregnancy</b>                  | Inflammatory response/(10)<br>P=0.000151 | <i>Axl, Ncf1, Ptgis, Ccl6, Ccl9, Il33, Cxcl1, Tlr13, Ccl2, Ctss</i>                                                                                                                                                                                                                                                                                                                                                                                                                                                                                                                                                             |
|                                               | Immune system process/(16)<br>P=0.00173  | <i>Scin, Axl, Ncf1, Ccl6, Ccl9, Mknk2, Fyb, Sla, Il33, Fbn1, Cxcl1, Tsc22d3, Tlr13, Ccl2, March1, Ctss</i>                                                                                                                                                                                                                                                                                                                                                                                                                                                                                                                      |
| <b>Hif1a<sup>+/-</sup> diabetic pregnancy</b> | Immune system process/(54)<br>P=2.72E-16 | <i>Itgb2, Cfp, Scin, Axl, Hck, Blk, Ncf1, Lbp, Mmp9, Ccl6, Ccl9, Plek, Myo1g, Fyb, Sla, Hcls1, Clec4n, Il33, Ptprj, Ifitm1, Col3a1, Cd55, Mrc1, Fcna, Fbn1, Ecm1, Kcnab2, Pf4, Cxcl1, Mfap5, Ctsc, Tyrobp, Coro1a, Tgfbr2, Malt1, Casp4, Tlr13, Vav1, Cd300ld, Ccl7, Ccl2, March1, C1qa, C1qc, C1qb, Ctss, Lrp1, C3ar1, Nbl1, Dact2, C5ar1, Cd14, Cd248, Pirb</i>                                                                                                                                                                                                                                                               |
|                                               | Developmental process/(61)<br>P=0.00226  | <i>Itgb2, Timp1, Scin, Axl, Hck, Fbln1, Aldh1a2, Blk, Adamtsl4, Mmp9, Ptgis, Myh11, Ccl9, Plek, Myocd, Stmn4, Dab2, Sla, Hcls1, Il33, Msr1, Ifitm1, Clec3b, Gsta3, Col3a1, Fbn1, Duoxa1, Dclk1, Ecm1, Kcnab2, Pf4, Cxcl1, Mfap5, Ctsc, Tyrobp, Coro1a, Tgfbr2, Malt1, Duox1, Casp4, Vav1, Loxl2, Ccl7, Ccl2, C1qc, C1qb, Nrn1, Lrp1, C3ar1, Ildr2, Cd53, Nbl1, Stab1, Adra1a, Ptgs1, Amigo2, Dact2, C5ar1, Kdm3a, Cd248, Pirb</i>                                                                                                                                                                                               |
|                                               | Response to stimulus/(90)<br>P=3.38E-6   | <i>Itgb2, Cfp, Timp1, Vwf, Axl, Hck, Fbln1, G0s2, Aldh1a2, Blk, Ncf1, Lbp, Igfbp4, Mmp9, Ptgis, Ccl6, Ccl9, Plek, Myo1g, Myocd, Iqgap2, Dok2, Fyb, Dab2, Sla, Fstl1, Hcls1, Clec4n, Il33, Msr1, Ptprj, Ifitm1, Clec3b, Gsta3, Col3a1, Cd55, Mrc1, Fcna, Fbn1, Tspan18, Duoxa1, Dclk1, Ecm1, Laptm5, Pf4, Cxcl1, Arpc1b, Ctsc, Tyrobp, Coro1a, Itgam, Lyve1, Cotl1, Rrad, Tgfbr2, Malt1, Duox1, Casp4, Tlr13, Vav1, Loxl2, Ccl7, Ccl2, March1, C1qa, C1qc, C1qb, Ctss, F13a1, Lrp1, C3ar1, Ildr2, Cd53, Nbl1, Stab1, Olfr78, Adgrd1, Gpr22, Acker2, Adra1a, Ptgs1, Frat2, P2ry6, Dact2, C5ar1, Cd14, Kdm3a, Pirb, Lyz2, SrpX</i> |
|                                               | Cell communication/(69)<br>P=0.00108     | <i>Itgb2, Timp1, Axl, Hck, Fbln1, G0s2, Aldh1a2, Blk, Ncf1, Lbp, Igfbp4, Mmp9, Ptgis, Ccl6, Ccl9, Plek, Myo1g, Myocd, Iqgap2, Dok2, Fyb, Dab2, Sla, Hcls1, Clec4n, Il33, Ptprj, Col3a1, Mrc1, Fcna, Fbn1, Tspan18, Dclk1, Ecm1, Pf4, Cxcl1, Ctsc, Tyrobp, Coro1a, Itgam, Lyve1, Rrad, Tgfbr2, Malt1, Duox1, Casp4, Tlr13, Vav1, Ccl7, Ccl2, Lrp1, C3ar1, Ildr2, Cd53, Nbl1, Stab1, Olfr78, Adgrd1, Gpr22, Acker2, Adra1a, Frat2, P2ry6, Dact2, C5ar1, Cd14, Kdm3a, Pirb, SrpX</i>                                                                                                                                               |

**Table S8.** Continued

|                                               | <b>Enriched biological process category/Hits (N)</b> | <b>List of genes</b>                                                                                                                                                                                                                                                                                                                                                       |
|-----------------------------------------------|------------------------------------------------------|----------------------------------------------------------------------------------------------------------------------------------------------------------------------------------------------------------------------------------------------------------------------------------------------------------------------------------------------------------------------------|
| <b>Hif1a<sup>+/-</sup> diabetic pregnancy</b> | Apoptotic process/(26)<br>P=0.0455                   | <i>Timp1, Scin, Axl, Hck, G0s2, Aldh1a2, Adamtsl4, Ncf1, Mmp9, Ptgis, Myocd, Dab2, Hcls1, Il33, Pf4, Ctsc, Coro1a, Tgfbr2, Malt1, Casp4, Ccl2, Lrp1, Amigo2, C5ar1, Cd248, SrpX</i>                                                                                                                                                                                        |
|                                               | Regulation of angiogenesis/(9)<br>P=0.0244           | <i>Itgb2, Ptgis, Ecm1, Pf4, Tgfbr2, Ccl2, C3ar1, Stab1, C5ar1</i>                                                                                                                                                                                                                                                                                                          |
|                                               | Cell proliferation/(30)<br>P=0.00159                 | <i>Timp1, Scin, Hck, Fbln1, Aldh1a2, Blk, Ncf1, Igfbp4, Mmp9, Myocd, Sla, Hcls1, Il33, Ptpnj, Ifitm1, Dpt, Ecm1, Pf4, Cxcl1, Coro1a, Tgfbr2, Malt1, Folr2, Loxl2, Ccl2, Lrp1, Ptgs1, C5ar1, Cd248, SrpX</i>                                                                                                                                                                |
|                                               | Endocytosis/(18)<br>P=0.00025                        | <i>Axl, Hck, Lbp, Myo1g, Dab2, Msr1, Mrc1, Coro1a, Tgfbr2, Vav1, Loxl2, Ccl2, Lrp1, Stab1, Ackr2, Cd14, Ncf4, SrpX</i>                                                                                                                                                                                                                                                     |
|                                               | Response to stress/(55)<br>P=1.84E-09                | <i>Itgb2, Cfp, Timp1, Vwf, Axl, Hck, Fbln1, Blk, Ncf1, Lbp, Igfbp4, Mmp9, Ptgis, Ccl6, Ccl9, Plek, Myocd, Sla, Fstl1, Clec4n, Il33, Ifitm1, Col3a1, Cd55, Mrc1, Fcna, Duoxa1, Ecm1, Pf4, Cxcl1, Tyrobp, Coro1a, Cotl1, Tgfbr2, Malt1, Duox1, Casp4, Tlr13, Vav1, Loxl2, Ccl7, Ccl2, C1qa, C1qc, C1qb, Ctss, F13a1, C3ar1, Stab1, Ackr2, Ptgs1, C5ar1, Cd14, Lyz2, SrpX</i> |
|                                               | Leukocyte migration/(17)<br>P=9.51E-09               | <i>Itgb2, Lbp, Mmp9, Ccl6, Ccl9, Myo1g, Il33, Ecm1, Pf4, Cxcl1, Coro1a, Vav1, Ccl7, Ccl2, C3ar1, Nbl1, C5ar1</i>                                                                                                                                                                                                                                                           |
|                                               | Extracellular matrix organization/(9)<br>P=0.0121    | <i>Fbln1, Adamtsl4, Mmp9, Myh11, Ccdc80, Col3a1, Dpt, Loxl2, Ctss</i>                                                                                                                                                                                                                                                                                                      |
