# Supplementary material for: Adverse effects of Hif1a mutation and maternal diabetes on the offspring heart
Source: Springer Nature journal article supplement (doi:10.1186/s12933-018-0713-0), 2018-05-12
Supplement: MOESM10 [file 15759178]

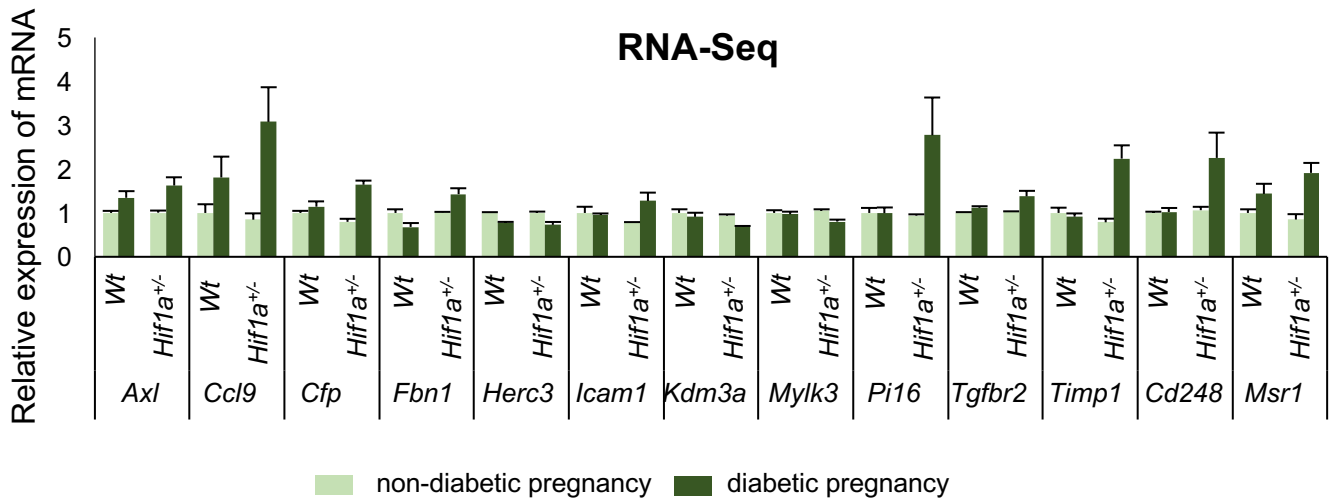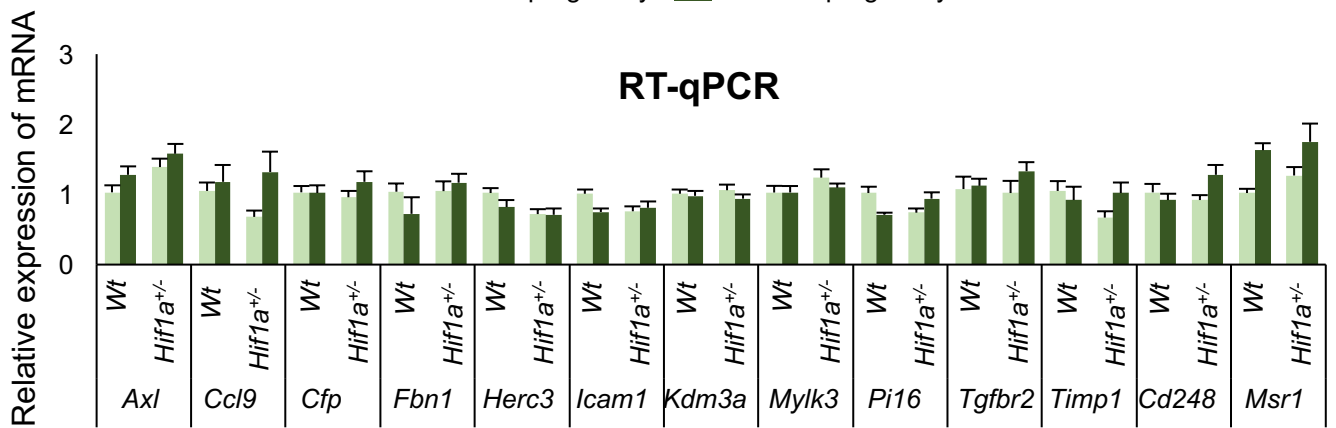

**Figure S1. RNaseq data validation by RT-qPCR.** The values are mean  $\pm$  SEM (n = 3/group for RNA-Seq, n = 8/group for RT-qPCR).
