# Supplementary material for: Adverse effects of Hif1a mutation and maternal diabetes on the offspring heart
Source: Springer Nature journal article supplement (doi:10.1186/s12933-018-0713-0), 2018-05-12
Supplement: MOESM11 [file 15759178]

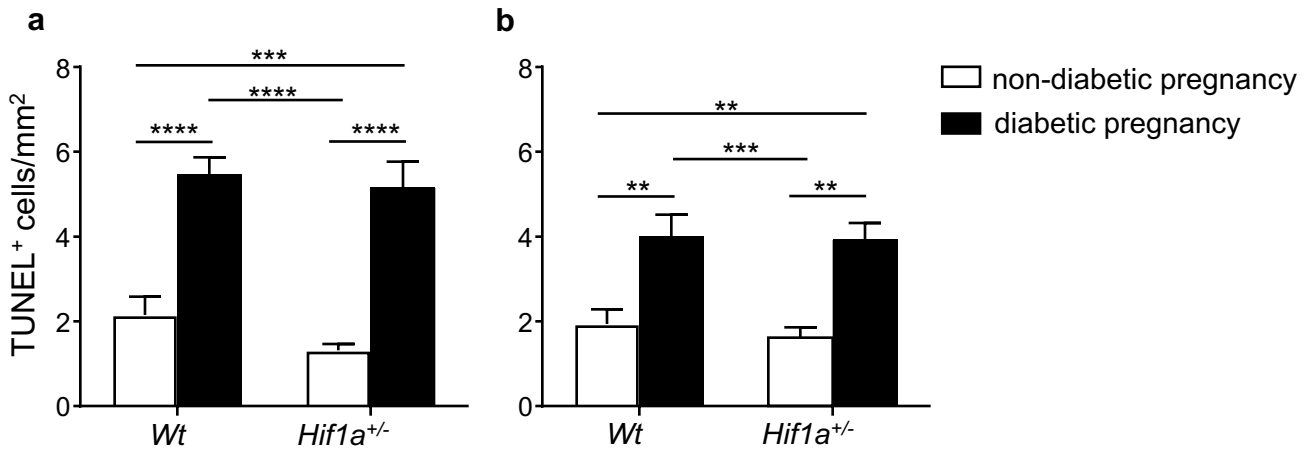

**Figure S2. Quantification of TUNEL<sup>+</sup> apoptotic cells per mm<sup>2</sup> of the RV myocardium (a) and septum (b).** The values are mean  $\pm$  SEM (n = 4 individuals/3 sections/group). Two-way ANOVA indicating a significant effect of diabetes (RV: P < 0.0001; septum: P < 0.0001) followed by post hoc Tukey's multiple-comparison test, \*\*P < 0.01, \*\*\*P < 0.001, \*\*\*\* P < 0.0001.
